# Supplementary material for: Reprogramming capacity of Nanog is functionally conserved in vertebrates and resides in a unique homeodomain
Source: PubMed Central journal article supplement — Development. 2011 Nov 15;138(22):4853–65. doi: 10.1242/dev.068775 (PMC3201656; doi:10.1242/dev.068775), 2011-11-15

A

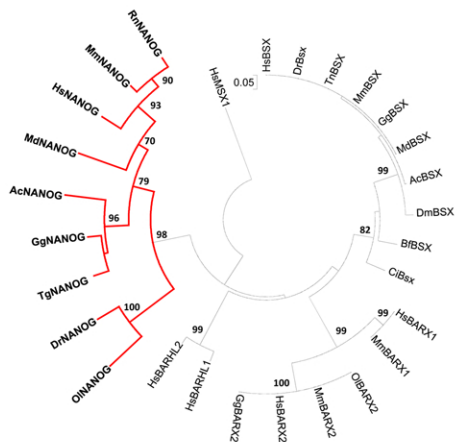

B

Nanog and other nearby genes translocated from ancestral locus in OI "A" into another chromosome (OI "B")

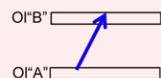

3R (Duplication of fish genome)

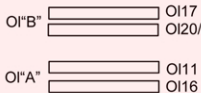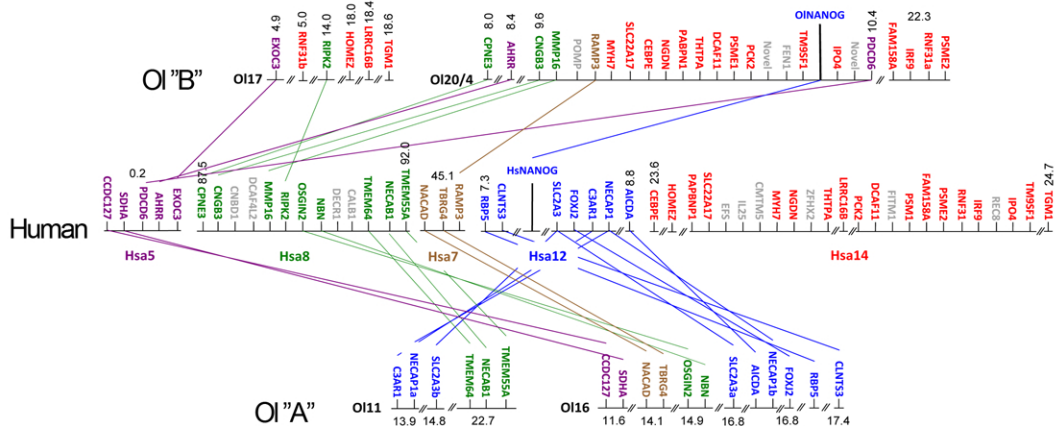

Supplement: supp_138.22.4853_DEV068775FigS2.pdf [file supp_138.22.4853_DEV068775FigS2.pdf]
