# Supplementary material for: Reprogramming capacity of Nanog is functionally conserved in vertebrates and resides in a unique homeodomain
Source: PubMed Central journal article supplement — Development. 2011 Nov 15;138(22):4853–65. doi: 10.1242/dev.068775 (PMC3201656; doi:10.1242/dev.068775), 2011-11-15
Supplement: supp_138.22.4853_DEV068775TableS1.pdf [file supp_138.22.4853_DEV068775TableS1.pdf]

Table S1. Primers

|                       |                                      |                                                                                     |
|-----------------------|--------------------------------------|-------------------------------------------------------------------------------------|
| Mouse HD F (P1)       | AAGCAGAAGATGCGGACTGT                 | RT-PCR to detect mNanog HD                                                          |
| Mouse HD R (P2)       | GCTTGCACTTCATCCTTTGG                 |                                                                                     |
| Mouse Full F (P3)     | ATGAAGTGCAAGCGGTGGCAGAAA             | RT-PCR to detect full-length mNanog                                                 |
| Mouse Full R (P4)     | CCTGGTGGAGTCACAGAGTAGTTC             |                                                                                     |
| Zebrafish HD F (P5)   | ACGCCTGCAGAGATGAAAAC                 | RT-PCR to detect zNanog HD                                                          |
| Zebrafish HD R (P6)   | TTGGGTACAGCATTGACAACA                |                                                                                     |
| Zebrafish Full F (P7) | CAAAGATGCAGAGCAGACCA                 | RT-PCR to detect full-length zNanog                                                 |
| Zebrafish Full R (P8) | ACCGATTGACCAAAGCATT                  |                                                                                     |
| Retr. Oct4-F          | TGGTACGGGAAATCACAAAGTTTGT            | Custom TaqMan gene expression assay for retroviral transgene                        |
| Retr. Oct4-R          | GGTGAGAAGGCGAAGTCTGAAG               |                                                                                     |
| Retr. Oct4-probe      | FAM-CACCTTCCCCATGGCTG-MGB            |                                                                                     |
| Retr. Klf4-F          | TGGTACGGGAAATCACAAAGTTTGT            | Custom TaqMan gene expression assay for retroviral transgene                        |
| Retr. Klf4-R          | GAGCAGAGCGTCGCTGA                    |                                                                                     |
| Retr. Klf4-probe      | FAM-CCCTTCACCATGGCTG-MGB             |                                                                                     |
| Retr. cMyc-F          | TGGTACGGGAAATCACAAAGTTTGT            | Custom TaqMan gene expression assay for retroviral transgene                        |
| Retr. cMyc-R          | GGTCATAGTTCCTGTTGGTGAAGTT            |                                                                                     |
| Retr. Myc-probe       | FAM-CCCTTCACCATGGCTG-MGB             |                                                                                     |
| Retr. Sox2-F          | TGGTACGGGAAATCACAAAGTTTGT            | Custom TaqMan gene expression assay for retroviral transgene                        |
| Retr. Sox2-R          | GCCCGCGGCTTCA                        |                                                                                     |
| Retr. Sox2-probe      | FAM-CTCCGTCTCCATCATGTTAT-MGB         |                                                                                     |
| End. Oct4-F           | TTCACCAAGGCCCC                       | Custom TaqMan gene expression assay for endogenous transcript                       |
| End. Oct4-R           | GGTGAGAAGGCGAAGTCTGAAG               |                                                                                     |
| End. Oct4-probe       | FAM-CCCACCTTCCCCATGGCT-MGB           |                                                                                     |
| hNanog-F              | AGCATCCGACTGTAAAGAATCTTCAC           | Custom TaqMan gene expression assay for hNanog transcript                           |
| hNanog-R              | CAGAAGACATTTGCAAGGATGGATAG           |                                                                                     |
| hNanog-probe          | FAM-TTCAGGCCCAAAATC-MGB              |                                                                                     |
| cNanog-F              | CGTTCATGGCTGTGGAGGAT                 | Custom TaqMan gene expression assay for cNanog transcript                           |
| cNanog-R              | GGGCGTTGCGACTTGT                     |                                                                                     |
| cNanog-probe          | FAM-CCACCTTTTCAAAGAAG-MGB            |                                                                                     |
| zNanog-F              | ACGCTCCCCAACACAGG                    | Custom TaqMan gene expression assay for zNanog transcript                           |
| zNanog-R              | GGGAACTCATAGTGCGTCACA                |                                                                                     |
| zNanog-probe          | FAM-ACCTGGCCTCTGCCCC-MGB             |                                                                                     |
| piggyBac-F            | GTGCTGTCTCATTTTTGGCAAA               | Custom TaqMan gene expression assay for piggyBac transcript                         |
| piggyBac-R            | TTGTACAAACTGTGATAGCTTATCG            |                                                                                     |
| piggyBac-probe        | FAM-ATACCCGCGAGGAATTC-MGB            |                                                                                     |
| aBsx-F                | CCTCTTCGGCAGACGATGTT                 | Custom TaqMan gene expression assay for amphioxus Bsx transcript                    |
| aBsx-R                | ACTCGCACAGATGTCTAGTTTGT              |                                                                                     |
| aBsx-probe            | FAM-CAGGCGACGATCCAT-MGB              |                                                                                     |
| aVent1-F              | TGCGGCCTCACATGCT                     | Custom TaqMan gene expression assay for amphioxus Vent1 transcript                  |
| aVent1-R              | CGGGTACGGTGAGTATCTGTT                |                                                                                     |
| aVent1-probe          | FAM-CCTCAGCCCGCAACA-MGB              |                                                                                     |
| Msx1                  | Applied Biosystems ID: Mm00440330_m1 | TaqMan gene expression assay                                                        |
| Nkx2.5                | Applied Biosystems ID: Mm00657783_m1 | TaqMan gene expression assay                                                        |
| Nr0b1                 | Applied Biosystems ID: Mm00431729_m1 | TaqMan gene expression assay                                                        |
| Nanog                 | Applied Biosystems ID: Mm02384862_g1 | TaqMan gene expression assay                                                        |
| Rex1                  | Applied Biosystems ID: Mm03053975_g1 | TaqMan gene expression assay                                                        |
| Klf2                  | Applied Biosystems ID: Mm01244979_g1 | TaqMan gene expression assay                                                        |
| Fgf5                  | Applied Biosystems ID: Mm00438919_m1 | TaqMan gene expression assay                                                        |
| Gata6                 | Applied Biosystems ID: Mm00802636_m1 | TaqMan gene expression assay                                                        |
| GAPDH                 | Applied Biosystems ID: 4352339E      | TaqMan gene expression assay                                                        |
| Xist-F                | GGTTCTCTCCAGAAGCTAGGAAG              | SYBR Green real time PCR                                                            |
| Xist-R                | TGGTAGATGGCATTGTGATTATATGG           |                                                                                     |
| GAPDH-F               | AGGTCGGTGTGAACGGATTTG                | SYBR green real time PCR                                                            |
| GAPDH-R               | TGTAGACCATGTAGTTGAGGTCA              |                                                                                     |
| Oct4-DE F             | GGTTTTAGAGGTTGGTTTTGGG               | Bisulfite methylation analysis of <i>Oct4</i> distal enhancer                       |
| Oct4-DE R             | CATCTCTAAACCCTCCATAAATC              |                                                                                     |
| Oct4-Promoter F1      | GGTTTTTAGAGGATGGTTGAGTG              | Round 1 primers for bisulfite methylation analysis of <i>Oct4</i> promoter          |
| Oct4-Promoter R1      | TCCAACCCTACTAACCCATCACC              |                                                                                     |
| Oct4-P F2             | GGTTAGAGGTTAAGGTTAGAGGGTG            | Round 2 (nested) primers for bisulfite methylation analysis of <i>Oct4</i> promoter |
| Oct4-P R2             | CCCCACCTAATAAAAAAATAAAAAA            | Taqman assay for ChIP analysis of mouse Oct4 distal enhancer (CR4 element)          |
| ChIP CR4 F            | GCATAACAAAGGTGCATGATAGCT             |                                                                                     |
| ChIP CR4 R            | AAATAAAGGCAGCGACTTGAA                |                                                                                     |
| ChIP CR4 probe        | TAGCCCTTCTTAATCTGCTA                 |                                                                                     |
| ChIP Xist F           | AGTCCACTGTAATTCCTTCGACG              | Taqman assay for ChIP analysis of Xist intron 1                                     |
| ChIP Xist R           | GCGATTACTTGTACAACAATGGTC             |                                                                                     |
| ChIP Xist probe       | AGAGCCAGACAATGCTAAGCCT               |                                                                                     |
| ChIP desert F         | GATTGCAGAGTAAGATCCCTTGAT             | Taqman assay for ChIP analysis of gene desert region on chromosome 5                |
| ChIP desert R         | GCGTAAGTTCTACATGCTGCTTA              |                                                                                     |
| ChIP desert probe     | CACCTGAAAGAATGACAGTGCAATTCA          |                                                                                     |
