# Supplementary figures and images for: Reprogramming capacity of Nanog is functionally conserved in vertebrates and resides in a unique homeodomain
Source: PubMed Central journal article supplement — Development. 2011 Nov 15;138(22):4853–65. doi: 10.1242/dev.068775 (PMC3201656; doi:10.1242/dev.068775), 2011-11-15

A

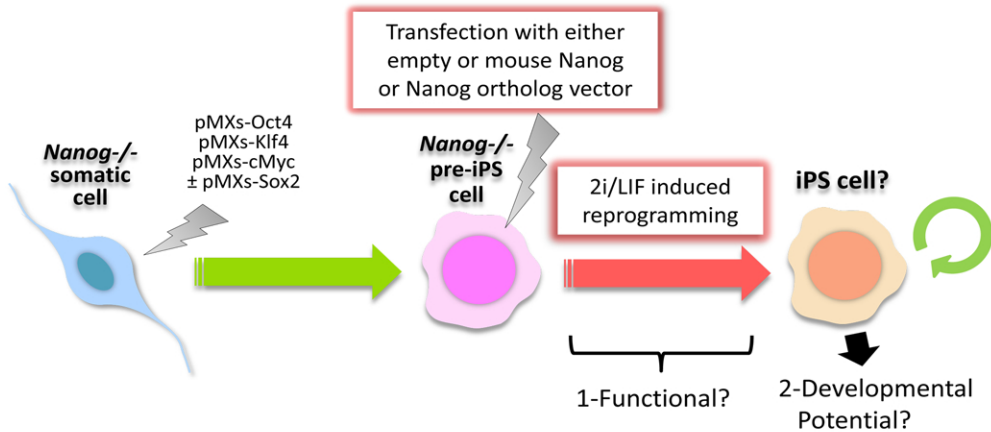

B

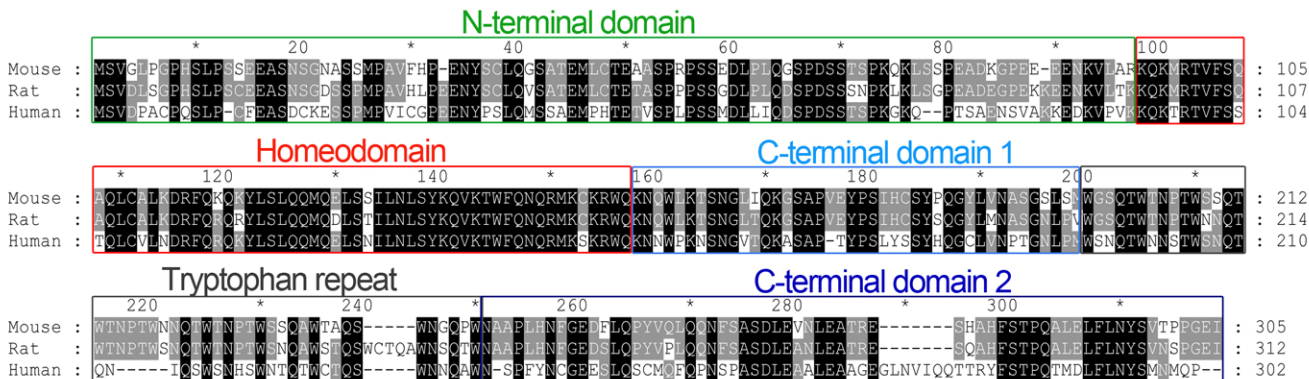

Supplement: supp_138.22.4853_DEV068775FigS1.pdf [file supp_138.22.4853_DEV068775FigS1.pdf]

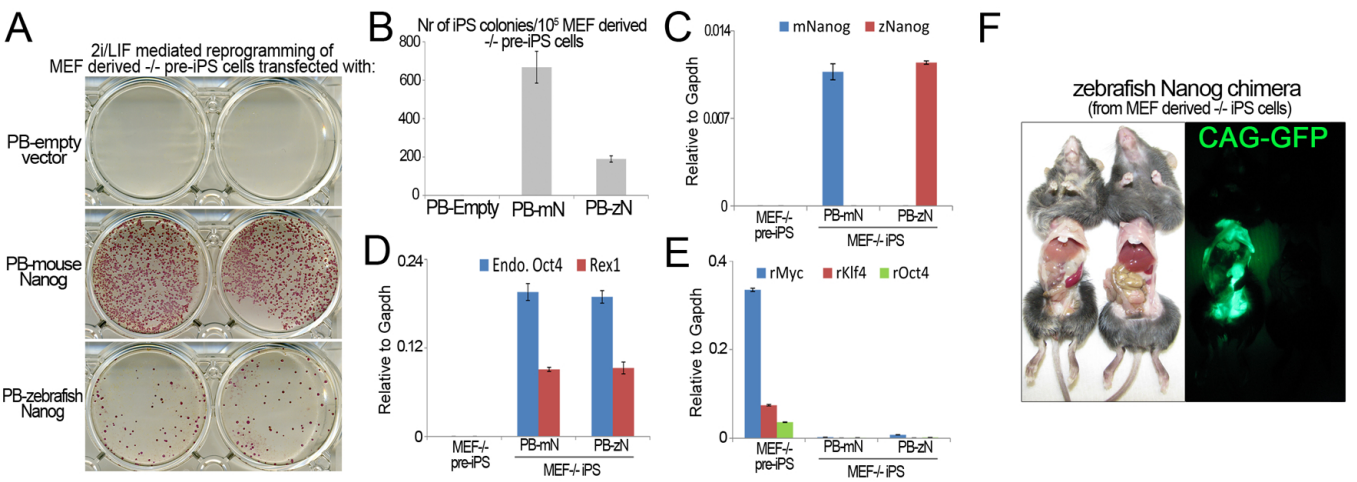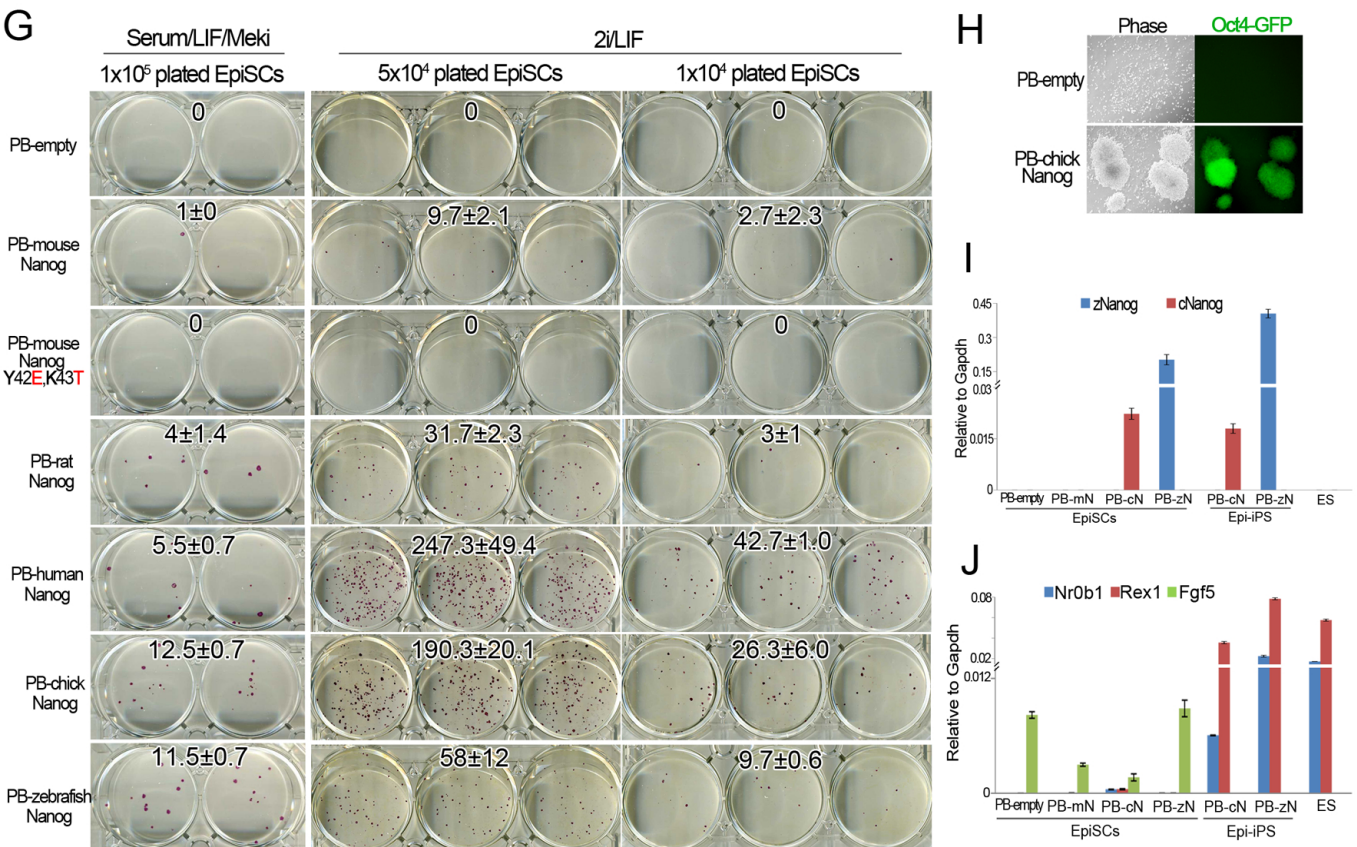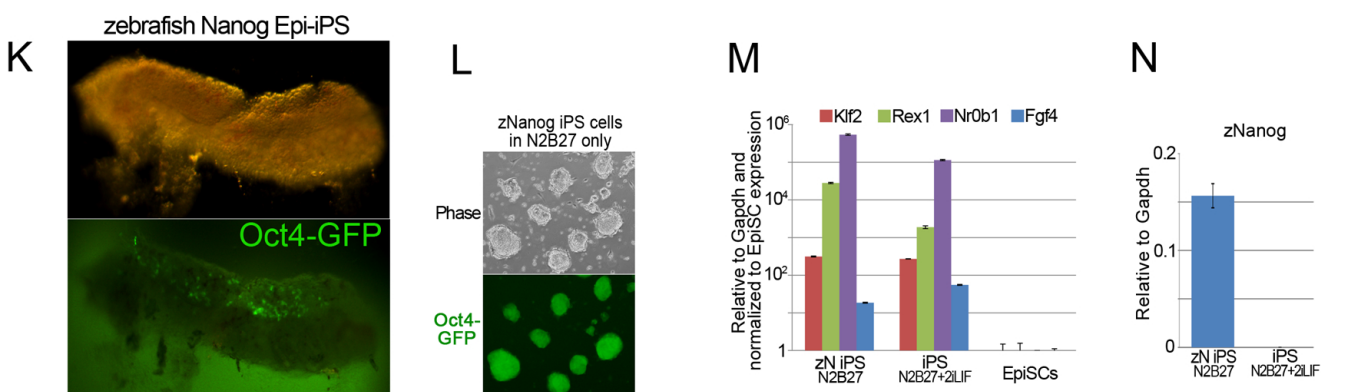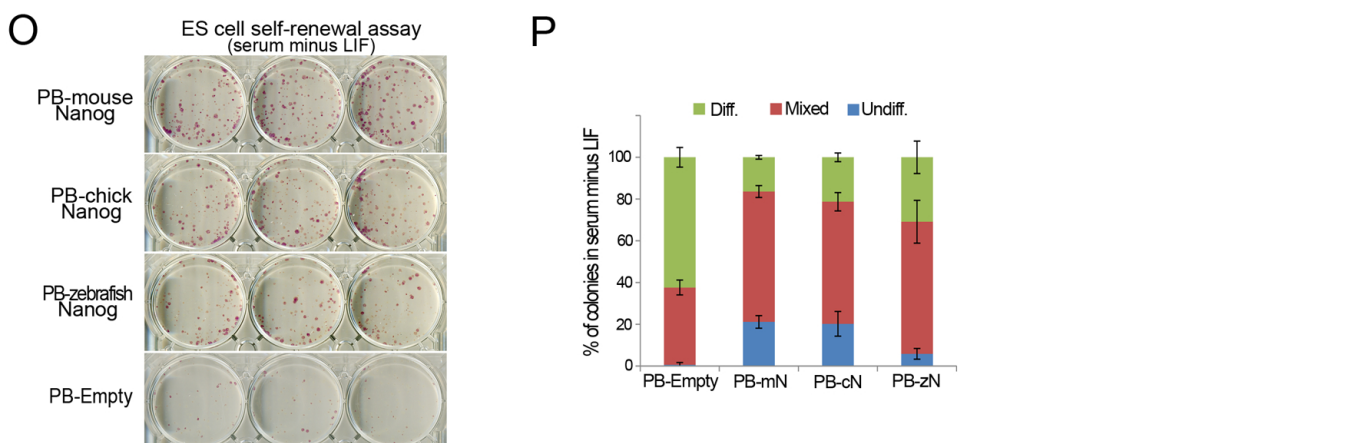

Supplement: supp_138.22.4853_DEV068775FigS3.pdf [file supp_138.22.4853_DEV068775FigS3.pdf]

**A**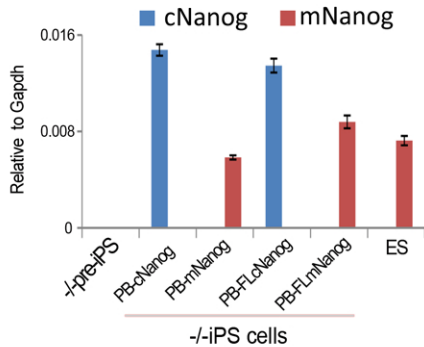**B**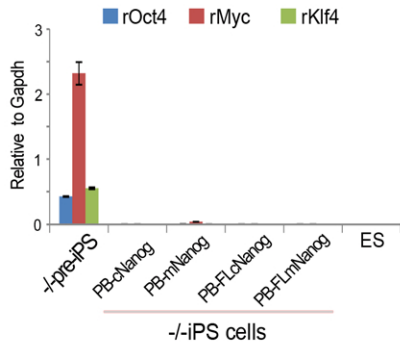**C**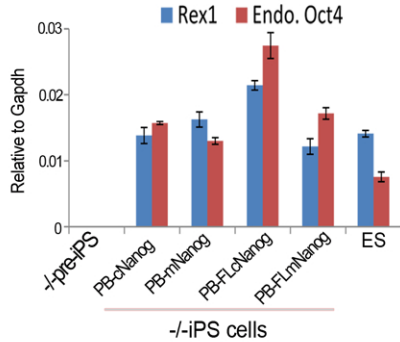

Supplement: supp_138.22.4853_DEV068775FigS4.pdf [file supp_138.22.4853_DEV068775FigS4.pdf]

A

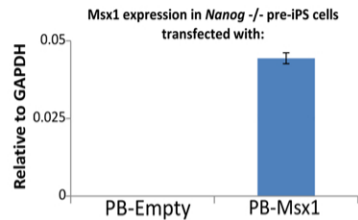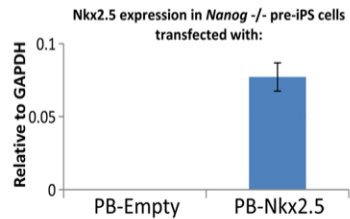

B

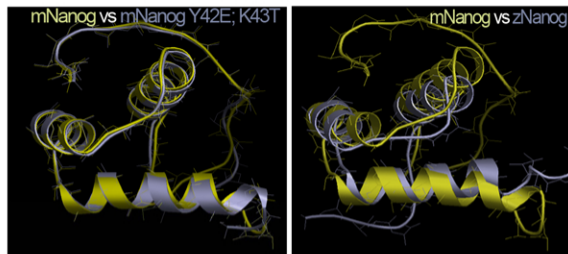

C

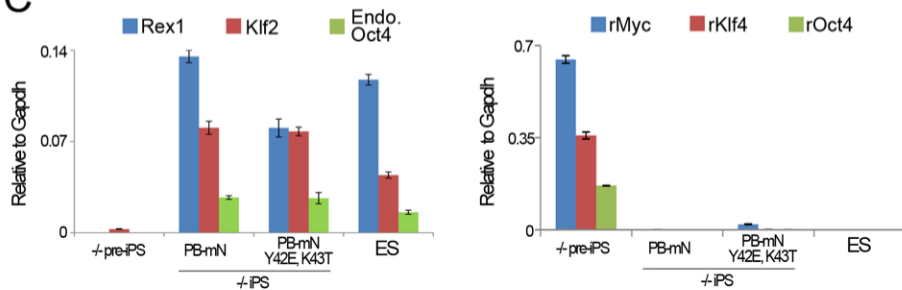

Supplement: supp_138.22.4853_DEV068775FigS5.pdf [file supp_138.22.4853_DEV068775FigS5.pdf]

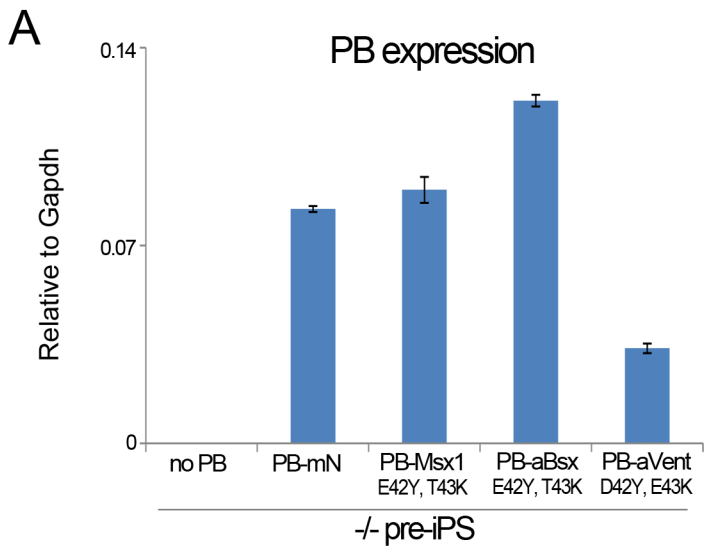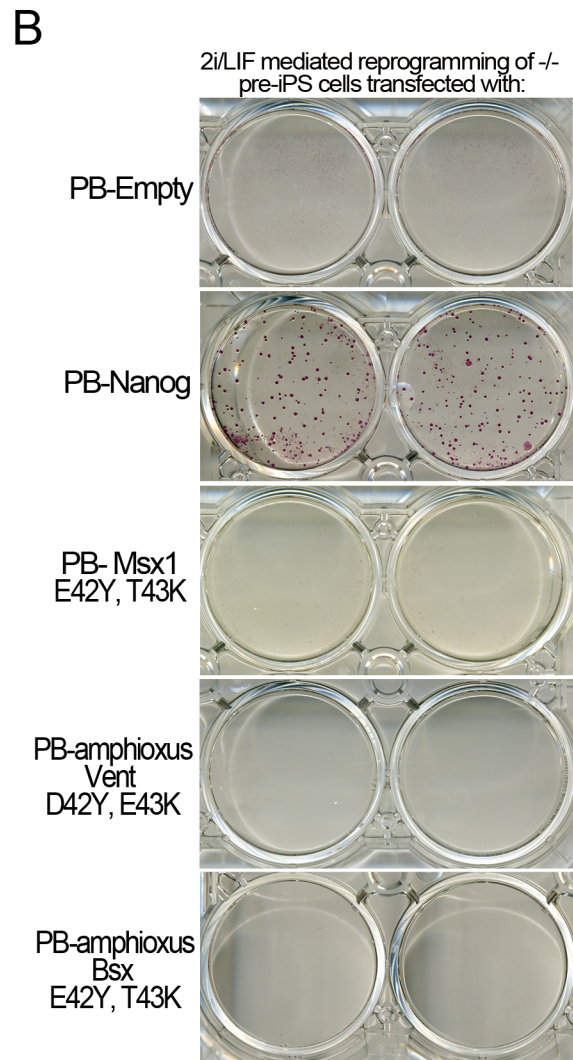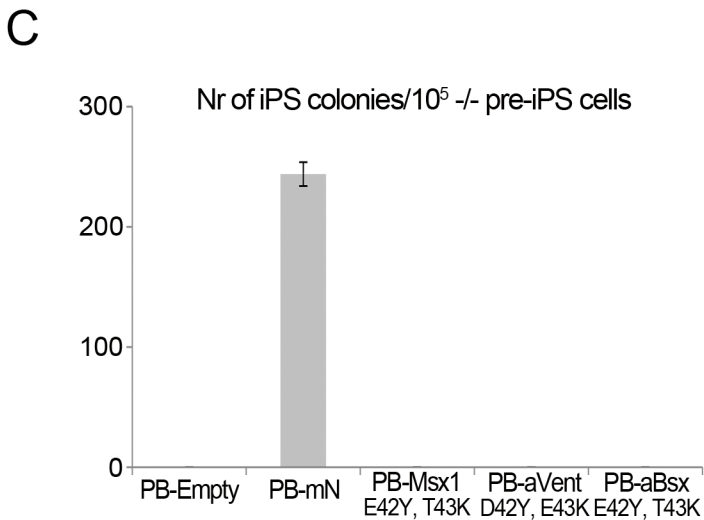

Supplement: supp_138.22.4853_DEV068775FigS6.pdf [file supp_138.22.4853_DEV068775FigS6.pdf]

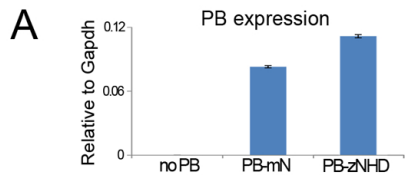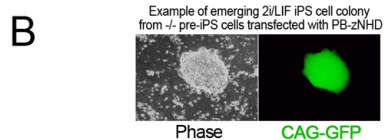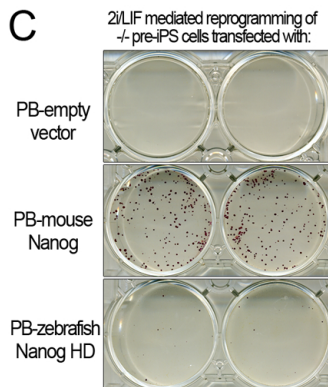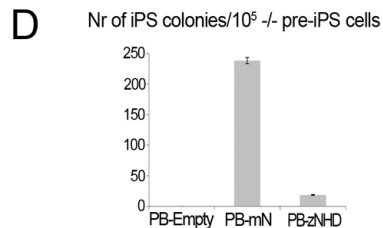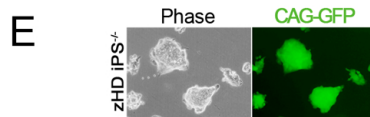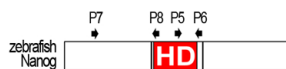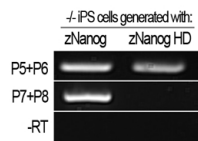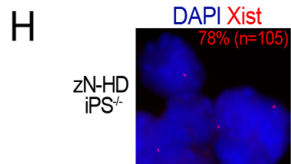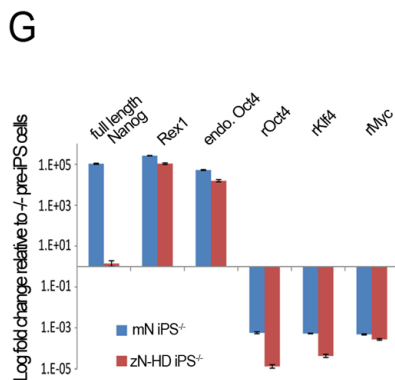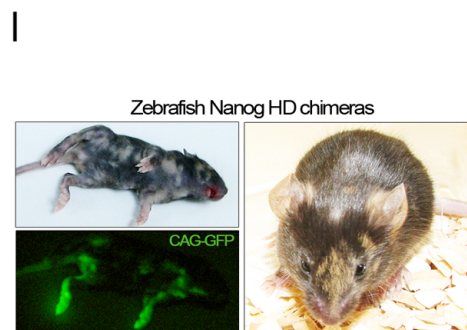

Supplement: supp_138.22.4853_DEV068775FigS7.pdf [file supp_138.22.4853_DEV068775FigS7.pdf]
